# Supplementary material
Source: HighWire-hosted journal article supplement (http://hw-f5-jim.highwire.org/highwire/filestream/140414/field_highwire_adjunct_files/2/AFMR_Podcast_70_2.pdf)

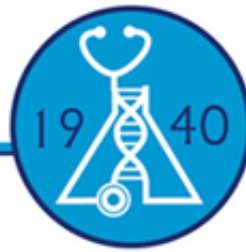

## Journal of Investigative Medicine Podcasts

[afmr.org/podcasts](http://afmr.org/podcasts)

### Covid-19 Vaccine in Children and Pregnancy

Presented Monday, November 22, 2021

by Sonja A. Rasmussen, MD

In this episode of the JIM Podcast, Editor-In-Chief Richard McCallum speaks with Dr. Sonja A. Rasmussen on the COVID-19 vaccine in children and pregnancy. Dr. Rasmussen is currently a Tenured Professor at the University of Florida in the Department of Pediatrics with a Joint Appointment at the Department of Epidemiology and Obstetrics and Gynecology.

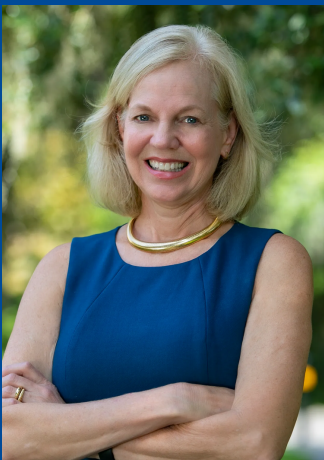

### New Pharmacology for Weight Loss

Presented Friday, December 10, 2021

by Gurdeep Singh, MD, FACE

In this episode of the JIM Podcast, Editor-in-Chief Richard McCallum speaks with Dr. Gurdeep Singh on the review entitled "Wegovy (Semaglutide) a new weight loss drug for chronic weight management" which was Editor's choice in the upcoming January issue of the *Journal of Investigative Medicine*. Dr. Singh is a Clinical Endocrinologist from Lake Erie College of Osteopathic Medicine at Our Lady of Lourdes Memorial Hospital in Binghamton, New York.

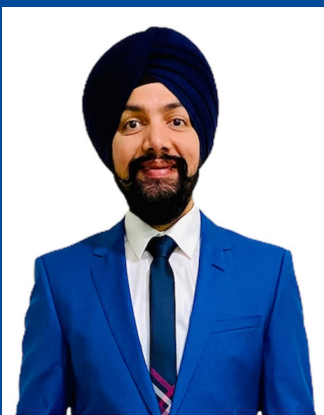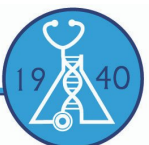

Supplement: AFMR_Podcast_70_2.pdf [file AFMR_Podcast_70_2.pdf]
